# Supplementary material for: Crossover between anti- and pro-oxidant activities of different manganese oxide nanoparticles and their biological implications
Source: Royal Society of Chemistry journal article supplement (doi:10.1039/c9tb02524c), 2020-01-01
Supplement: c9tb02524c1.pdf [file c9tb02524c1.pdf]

## Supporting information

### **Cross over between anti- and pro-oxidant activities of different manganese oxide nanoparticles and their biological implications**

Xiumei Jiang <sup>†</sup>, Patrick Gray <sup>†</sup>, Mehulkumar Patel <sup>‡</sup>, Jiwen Zheng <sup>‡</sup>, Jun-Jie Yin <sup>†\*</sup>

<sup>†</sup> Division of Analytical Chemistry and Division of Bioanalytical Chemistry, Office of Regulatory Science, Center for Food Safety and Applied Nutrition, U.S. Food and Drug Administration, College Park, Maryland 20740, United States

<sup>‡</sup> Division of Biology, Chemistry and Materials Science, Office of Science and Engineering Laboratories, Center for Devices and Radiological Health, U.S. Food and Drug Administration, Silver Spring, Maryland 20993, United States

\* Corresponding author: [Junjie.Yin@fda.hhs.gov](mailto:Junjie.Yin@fda.hhs.gov)

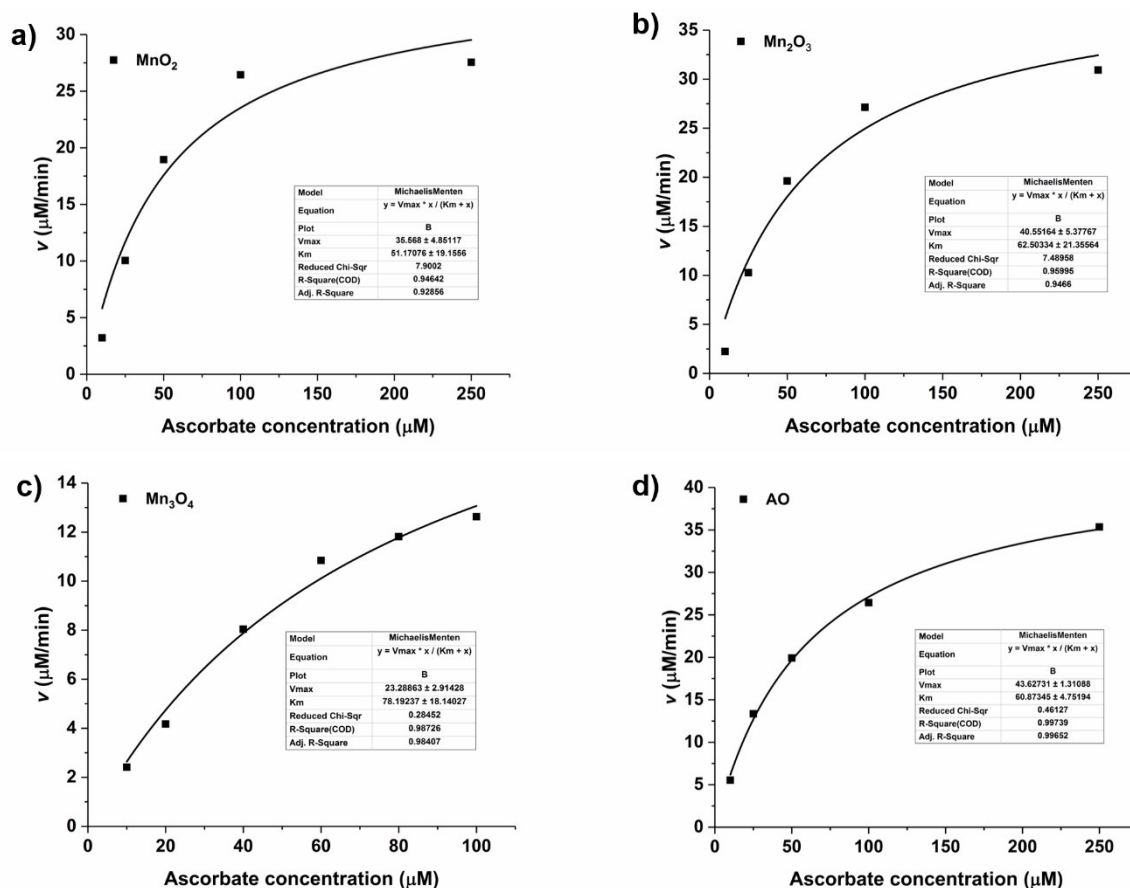

Figure S1. Characterization of the catalytic kinetics of ascorbate oxidase-like activities of  $\text{MnO}_x$  NPs. Michaelis-Menten curves for (a)  $\text{MnO}_2$ , (b)  $\text{Mn}_2\text{O}_3$ , and (c)  $\text{Mn}_3\text{O}_4$  NPs and (d) ascorbate oxidase (AO). The concentration of  $\text{MnO}_x$  NPs are 100  $\mu\text{M}$ , AO concentration is 1 U/ml and the ascorbate concentration varied from 10 to 250  $\mu\text{M}$ .

### Hydroxyl radical generation activity of $\text{MnO}_x$ NPs

The spin trap DMPO was used to detect hydroxyl radical ( $\bullet\text{OH}$ ) generation in the reaction of  $\text{MnO}_x$  NPs and  $\text{H}_2\text{O}_2$ . The spin adduct DMPO/ $\bullet\text{OH}$  yields a typical ESR spectrum with a relative intensity of 1:2:2:1. The instrument settings for hydroxyl radical measurement are 20 mW microwave power, 1 G modulation amplitude, and 100 G scan range.

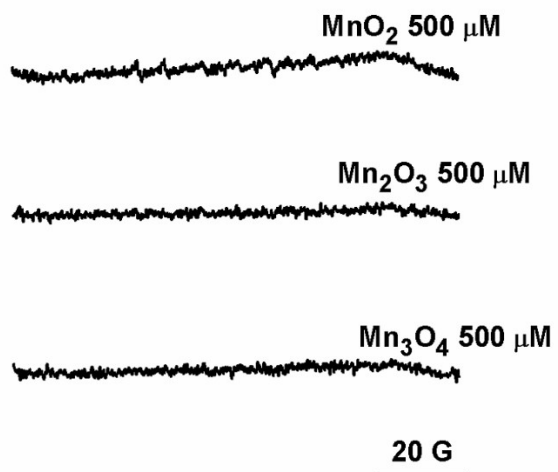

Figure S2. No hydroxyl radical was detected in the reaction of  $\text{MnO}_x$  NPs and  $\text{H}_2\text{O}_2$ . The concentrations are  $\text{MnO}_x$  500  $\mu\text{M}$  and  $\text{H}_2\text{O}_2$  20  $\mu\text{M}$ . The ESR spectra were recorded 5 min after the reaction started.

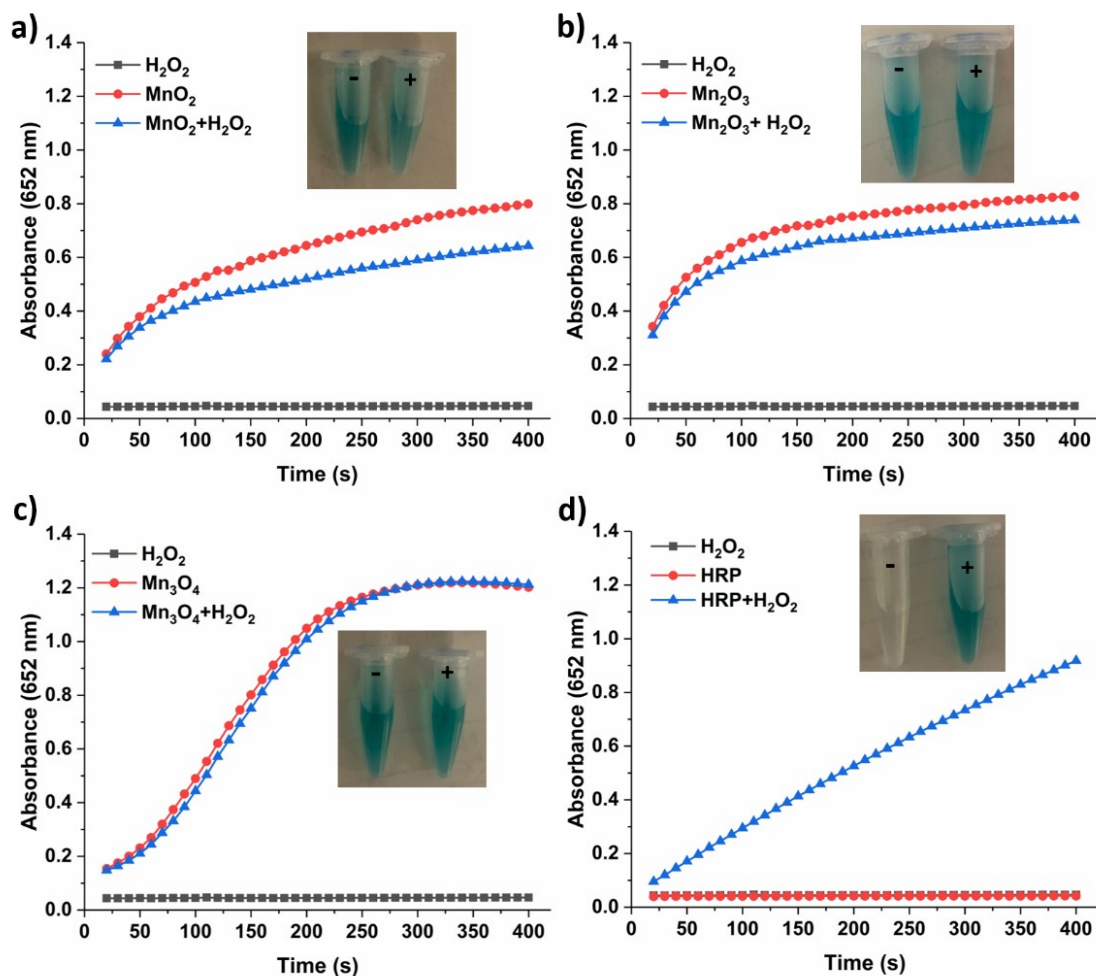

Figure S3. MnO<sub>x</sub> NPs exhibit no peroxidase-like activity. Reaction-time curve of TMB catalyzed by (a) MnO<sub>2</sub>, (b) Mn<sub>2</sub>O<sub>3</sub>, (c) Mn<sub>3</sub>O<sub>4</sub>, and (d) HRP in the presence or absence of H<sub>2</sub>O<sub>2</sub>. The absorbance at 652 nm was monitored 20 s from the reaction started and recorded every 10 s for 400 s. The concentrations are: TMB 0.1 mM, MnO<sub>2</sub> 50 μM, Mn<sub>2</sub>O<sub>3</sub> 20 μM, Mn<sub>3</sub>O<sub>4</sub> 100 μM, HRP 50 ng/mL, H<sub>2</sub>O<sub>2</sub> 0.1 mM. The reaction takes place in 0.2 M HAc-NaAc buffer at pH 3.5. Inserted photographs indicate the color of the TMB oxidation/peroxidation reaction. The +/- indicate with/without H<sub>2</sub>O<sub>2</sub>, respectively.

### Hydroxyl radical scavenging activity of MnO<sub>x</sub> NPs

In order to determine whether  $\text{MnO}_x$  NPs scavenge hydroxyl radical, we used Fenton reaction ( $20\ \mu\text{M}\ \text{H}_2\text{O}_2$  and  $20\ \mu\text{M}\ \text{FeSO}_4$ ) to generate hydroxyl radicals and mix with  $\text{MnO}_x$  NPs. The instrument settings are 20 mW microwave power, 1 G modulation amplitude, and 100 G scan range.

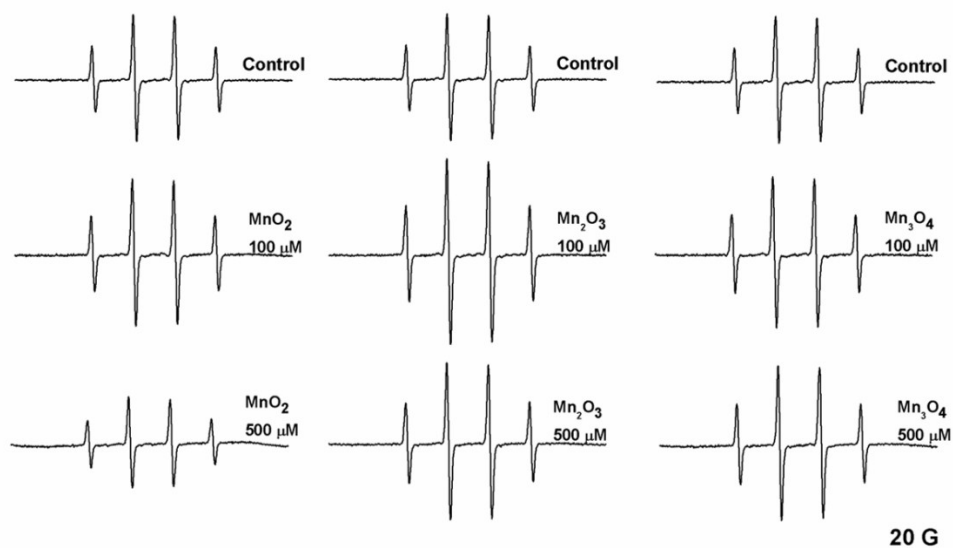

Figure S4.  $\text{MnO}_x$  NPs exhibit no hydroxyl radical scavenging activity. The hydroxyl radical was generated by the Fenton reaction, including  $\text{FeSO}_4$  ( $20\ \mu\text{M}$ ) and  $\text{H}_2\text{O}_2$  ( $20\ \mu\text{M}$ ) and mixed with different  $\text{MnO}_x$  NPs ( $100\ \mu\text{M}$ ,  $500\ \mu\text{M}$ ). The spin trap DMPO ( $50\ \text{mM}$ ) was used to trap hydroxyl radicals in the reaction. The spectra were recorded 5 min after the reaction started.

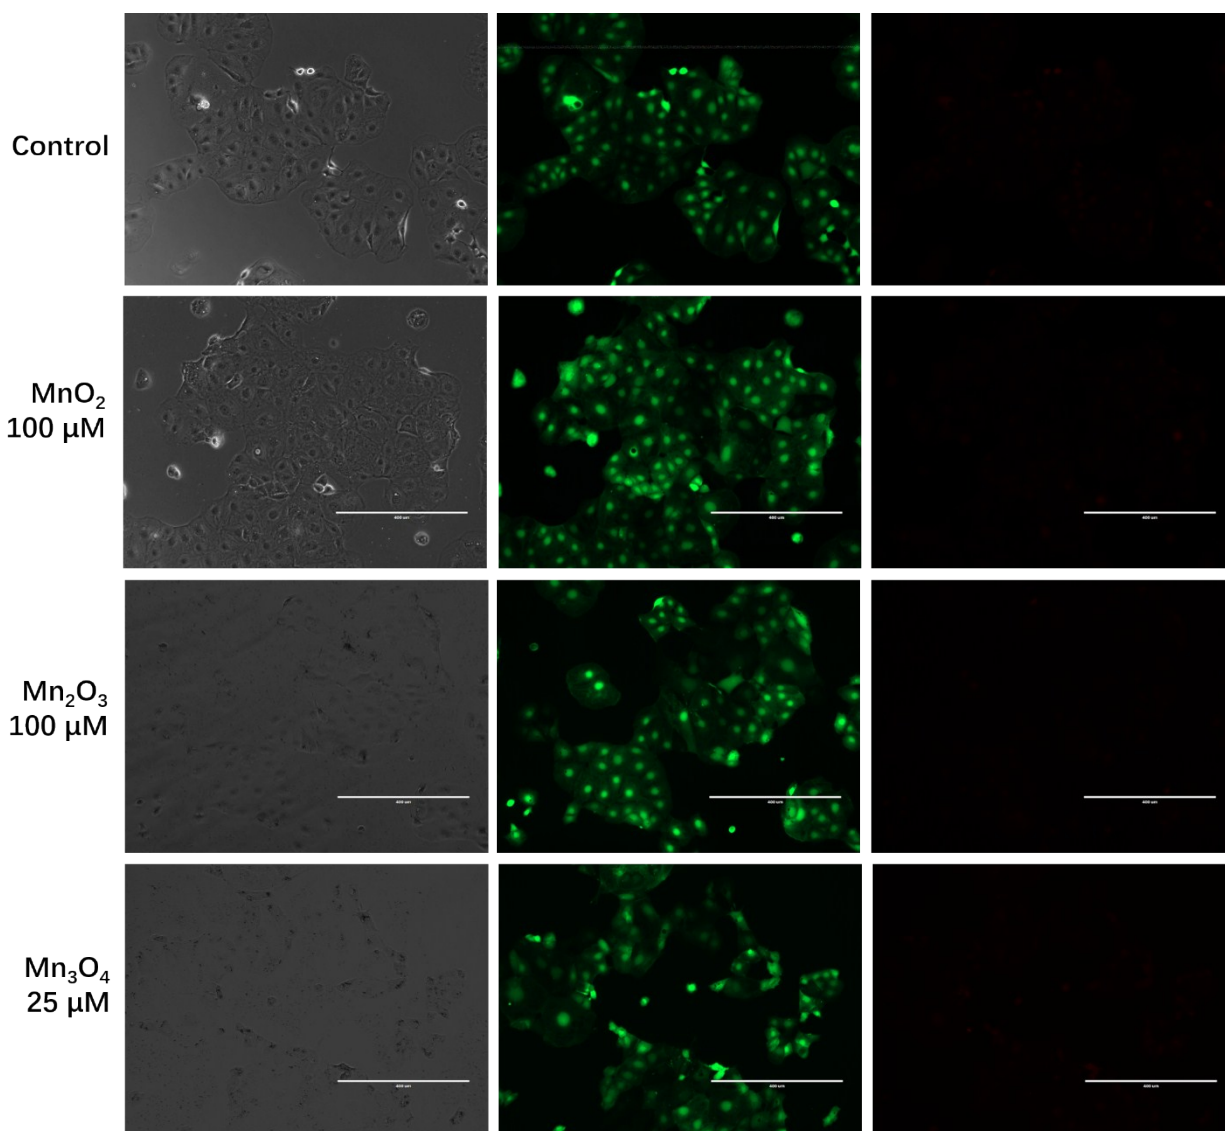

Figure S5. Live-dead cell staining of Caco-2 cells after exposure to different MnO<sub>x</sub> NPs for 24 h. Live cells were stained with calcein-AM (2 μg/ml) (green color) and dead cells with propidium iodide (PI, 2 μg/ml) (red color) for 30 min. The images were taken at 100 × magnification. Scale bars are 400 μm.

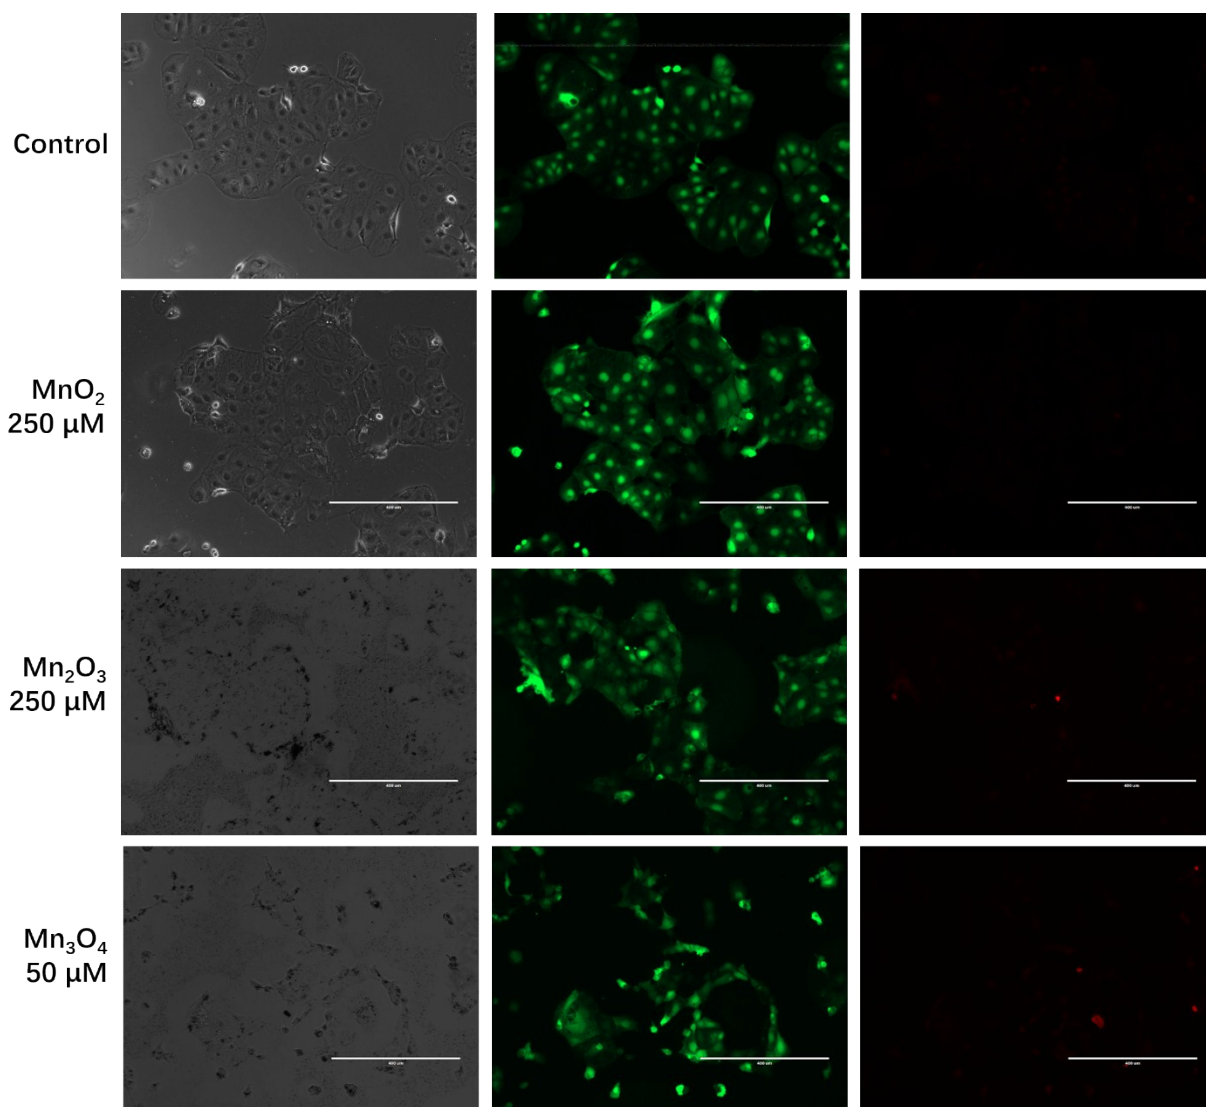

Figure S6. Live-dead cell staining of Caco-2 cells after exposure to different  $\text{MnO}_x$  NPs for 24 h. Live cells were stained with calcein-AM (2  $\mu\text{g}/\text{ml}$ ) (green color) and dead cells with PI (2  $\mu\text{g}/\text{ml}$ ) (red color) for 30 min. The images were taken at 100  $\times$  magnification. Scale bars are 400  $\mu\text{m}$ .
